# Supplementary material for: Ultrasensitive and recyclable SERS substrate based on Au-decorated Si nanowire arrays
Source: Royal Society of Chemistry journal article supplement (doi:10.1039/c3dt51686e), 2013-01-01

## **Electronic Supplementary Information (ESI)**

# **Ultrasensitive and Recyclable SERS substrate based on Au-decorated Si nanowire arrays**

**Xiaoling Yang, Hua Zhong, Yihua Zhu,\* Jianhua Shen, and Chunzhong Li\***

*Key Laboratory for Ultrafine Materials of Ministry of Education, School of Materials Science and Engineering, East China University of Science and Technology, Shanghai 200237, China*

\*Corresponding author: Tel.: +86-21-64252022, Fax: +86-21-64250624

E-mail address: yhzhu@ecust.edu.cn (Y. Zhu)

### **UV-induced photodegradation of Methylene Blue(MB) by Au-SiNWAs substrate**

The photocatalytic activity of the Au-SiNWAs substrate was tested in photodegradation of MB, with the same experimental setup used for RhB. As shown in the following graphs, presence of Au-SiNWAs substrate was more efficient than the corresponding absence of Au-SiNWAs substrate.

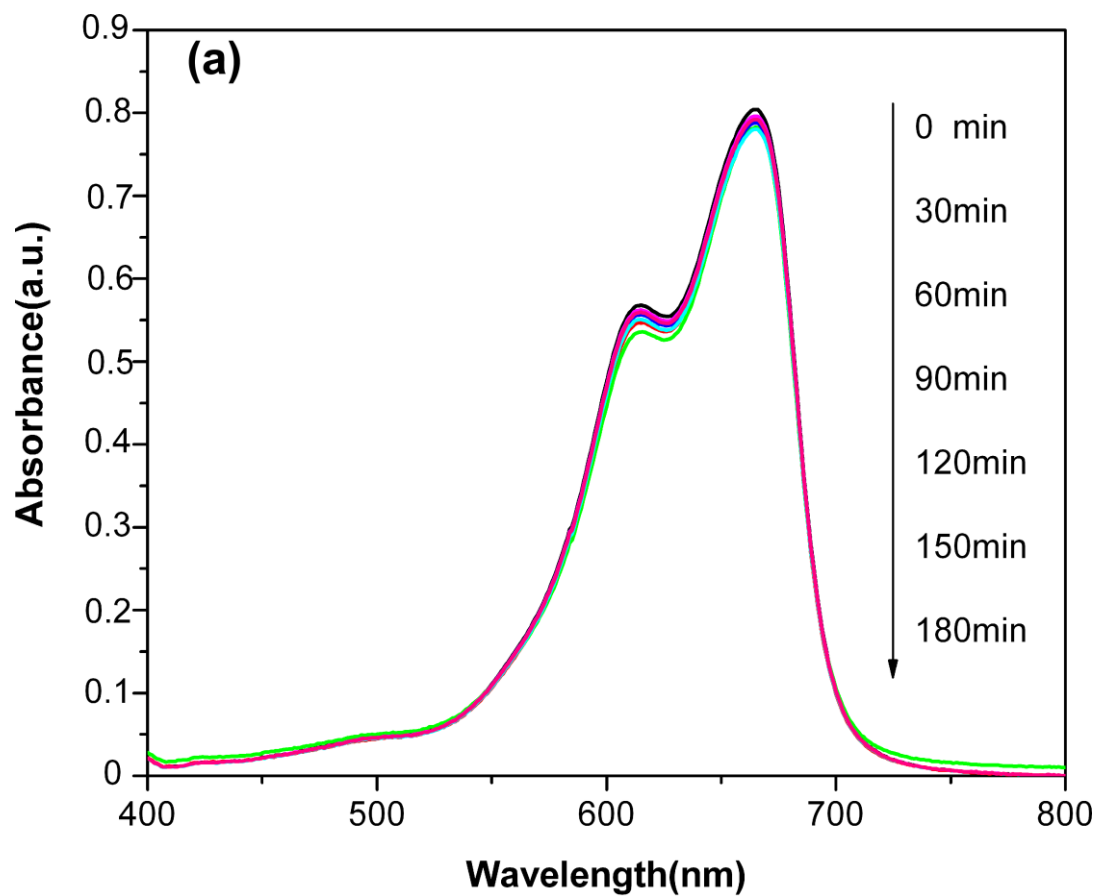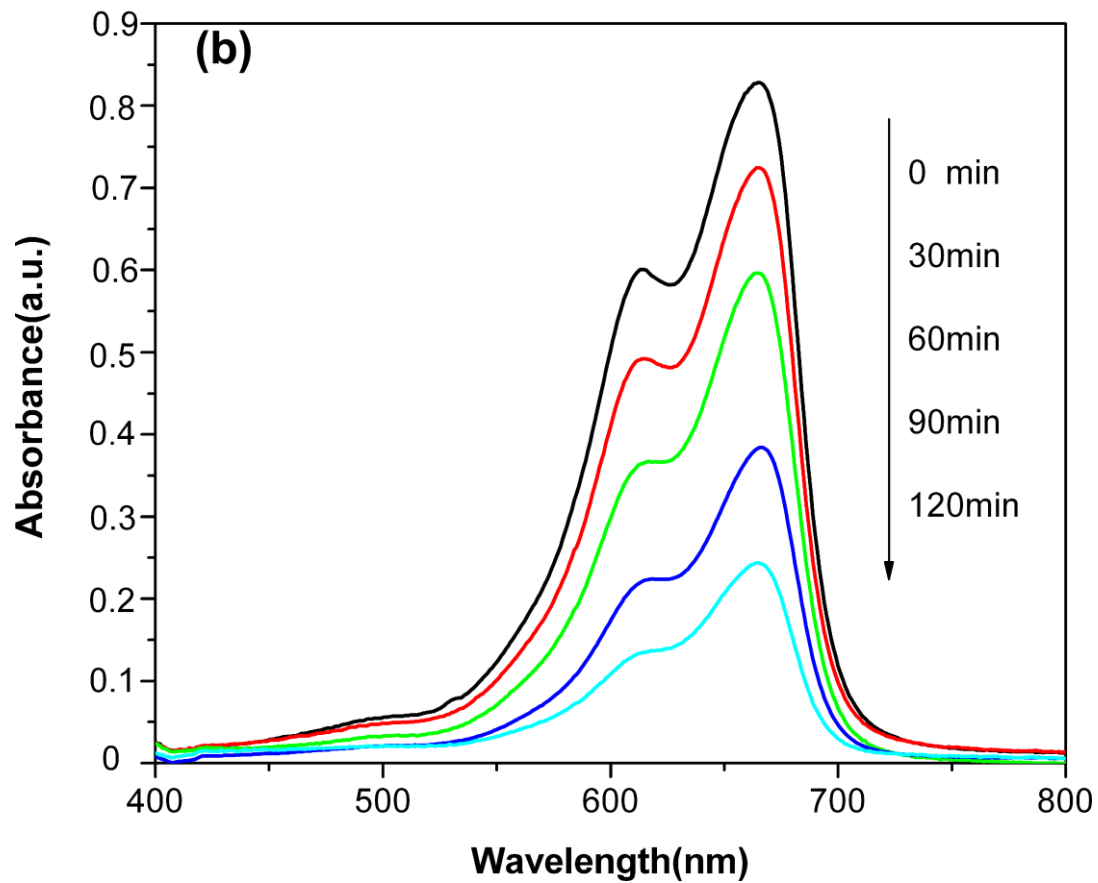

Supplement: c3dt51686e.pdf [file c3dt51686e.pdf]
